# Supplementary material for: One-pot preparation of long-wavelength carbon dots with targeting ability toward different organelles
Source: Royal Society of Chemistry journal article supplement (doi:10.1039/d3nj03235c), 2023-11-03
Supplement: d3nj03235c1.pdf [file d3nj03235c1.pdf]

## Electronic Supplementary Information (ESI)

### **One-pot preparation of long-wavelength carbon dots with targeting ability toward different organelles**

Xiao-Li Tian,<sup>a</sup> Xi He,<sup>b</sup> Ping Chen,<sup>a</sup> Lan Zhang,<sup>a</sup> Meng-Wei Hei,<sup>a</sup> Xiao-Qi Yu<sup>a</sup> and Ji Zhang<sup>\*a</sup>

<sup>a</sup> *Key Laboratory of Green Chemistry and Technology (Ministry of Education), College of Chemistry, Sichuan University, Chengdu, 610064, P. R. China*

<sup>b</sup> *Department of Critical Care Medicine, West China Hospital, Sichuan University, Chengdu, 610041, P. R. China*

E-mail: jzhang@scu.edu.cn

## 1. Experimental materials, reagents and instruments

**Materials and Reagents:** All chemical agents were acquired commercially and utilized without subsequent purification processing. p-phenylenediamine from Macklin (Shanghai, China). Anhydrous ethanol and other reagents were supplied by Aladdin Reagent Co. Ltd (Shanghai, China). Human Liver cancer HepG2 cells, HL-7702 cells were obtained from Shanghai Institute of Biochemistry and Cell Biology, Chinese Academy of Sciences. Fetal bovine serum (FBS) and 1640 medium were supplied by Invitrogen Corp. A Cell Counting Kit-8 was purchased from Dojindo Molecular Technologies, Inc. (Rockville, MD).

**Instrumentations:** Fourier transform infrared spectroscopy (FT-IR) was performed on an FTIR Nicolet 380 spectrometer. Transmission electron microscopy (TEM) observation was performed on a Tecnai G2 F20 S-TWIN instrument. X-ray photoelectron spectroscopy (XPS) of the CDs was performed on an Axis Ultra DLD spectrograph with Al/K $\alpha$  as the source. CLSM observation was performed using a confocal laser scanning microscope (CLSM, ZEISS LSM 780).

## 2. Synthesis of the carbon dots

Carbon dots were synthesized in anhydrous ethanol by solvothermal synthesis method. First, p-phenylenediamine (0.6 g) was mixed with 60 mL anhydrous ethanol and ultrasound was performed for 10 min, and then the mixture was transferred into a poly(tetrafluoroethylene)-lined autoclave (100 ml), and heated at constant temperature of 180 °C for 12 h. After the reaction, the autoclave was cooled to room temperature. The obtained dark brown solution was purified by column chromatography (dichloromethane / methanol = 50:1) to obtain **Y-CDs** and **R-CDs**. Two CDs were dissolved in anhydrous ethanol and stored in a refrigerator at 4 °C.

## 3. Optical properties

UV vis/fluorescence: **Y-CDs** and **R-CDs** with concentration of 0.02 mg/mL were employed for UV vis/Fluorescence spectra measurement at room temperature. Absolute PLQY: ethanol solution or aqueous solution of **Y-CDs** and **R-CDs** were diluted until the absorbance is 0.10 at the corresponding maximum absorption peaks. Then the absolute PLQY was acquired at the corresponding maximum excitation wavelength at room temperature with a blank quartz cell as the reference.

#### 4. Cell culture

HeLa (human cervical cancer cells) and HepG2 (human liver cancer cells) were cultured in DMEM supplemented with 10% fetal bovine serum (FBS) and 1% antibiotics (penicillin and streptomycin, 10 kU/mL). 7702 (human normal liver cells) and B16 (mouse melanoma cells) were cultured in 1640 supplemented with 10% fetal bovine serum (FBS) and 1% antibiotics (penicillin and streptomycin, 10 kU/mL). All cells were cultured at 37 °C with 5% CO<sub>2</sub> humidification atmosphere.

#### 5. Cytotoxicity assay

The cytotoxicity of **R-CDs** and **Y-CDs** were investigated in 7702 and HepG2 cells. Briefly, 7702 and HepG2 cells were cultured at  $1 \times 10^4$  per well in a 96-well plate for 24 h, then the old medium was replaced by fresh culture medium containing CDs of various concentration (5, 10, 20, 40, 60 µg/mL). The cells were further incubated for 24 h. The medium was removed and 100 µL fresh medium containing 10 µL CCK-8 was added and incubated for another 1-4 h. Finally, the absorbance at 450 nm was recorded by bio-RAD 680. The relative survival rate of cells was calculated as follows:

$$\text{Cell survival rate (\%)} = (\text{OD}_{450\text{-sample}} / \text{OD}_{450\text{-control}}) \times 100\%.$$

The untreated cell controls were taken as 100% cell viability.

#### 6. Co-localization of CDs with the commercial probe

Firstly, HepG2 cells were stained in DMEM media with **Y-CDs/R-CDs** at a concentration of 20 µg/mL for 20 minutes, and then washed by PBS (10 mM, pH 7.4) three times. After that, the cells were incubated with commercial organelle probes (500 nM Lyso-Tracker Green/1 µM ER-Tracker Green) for 30 min. CLSM observation was performed using a confocal laser scanning microscope (Green fluorescence channel,  $\lambda_{\text{ex}}/\lambda_{\text{em}} = 405/500\text{-}540$  nm, Red fluorescence channel,  $\lambda_{\text{ex}}/\lambda_{\text{em}} = 488/600\text{-}650$  nm).

#### 7. Photostability experiment

HepG2 cells were incubated with **Y-CDs/R-CDs** (20 µg/mL, 20 min), Lyso-Tracker Green (500 nM, 30 min) and ER Traker Green (1 µM, 30 min), respectively. The fluorescence image of CDs

( $\lambda_{\text{ex}}/\lambda_{\text{em}} = 488/600\text{-}650\text{ nm}$ ) and commercial organelle probes ( $\lambda_{\text{ex}}/\lambda_{\text{em}} = 405/500\text{-}540\text{ nm}$ ) were observed under a confocal microscope after 100 s of continuous laser irradiation.

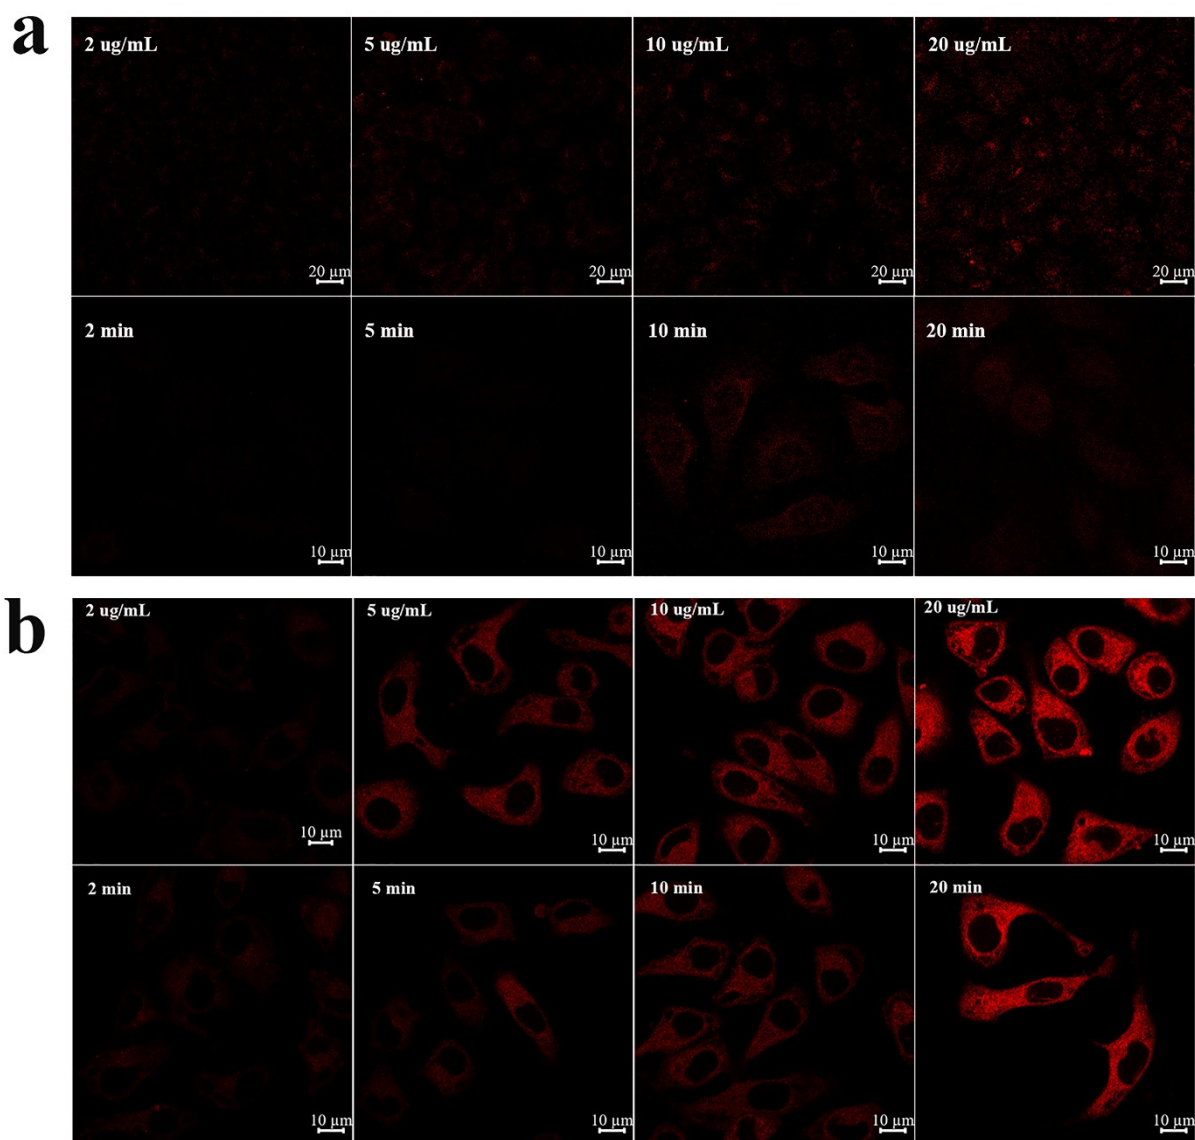

**Fig. S1** Fluorescence images of HepG2 cells incubated with Y-CDs (a) and R-CDs (b) with different concentrations and times ( $\lambda_{\text{ex}}/\lambda_{\text{em}} = 488/600\text{-}650\text{ nm}$ ).

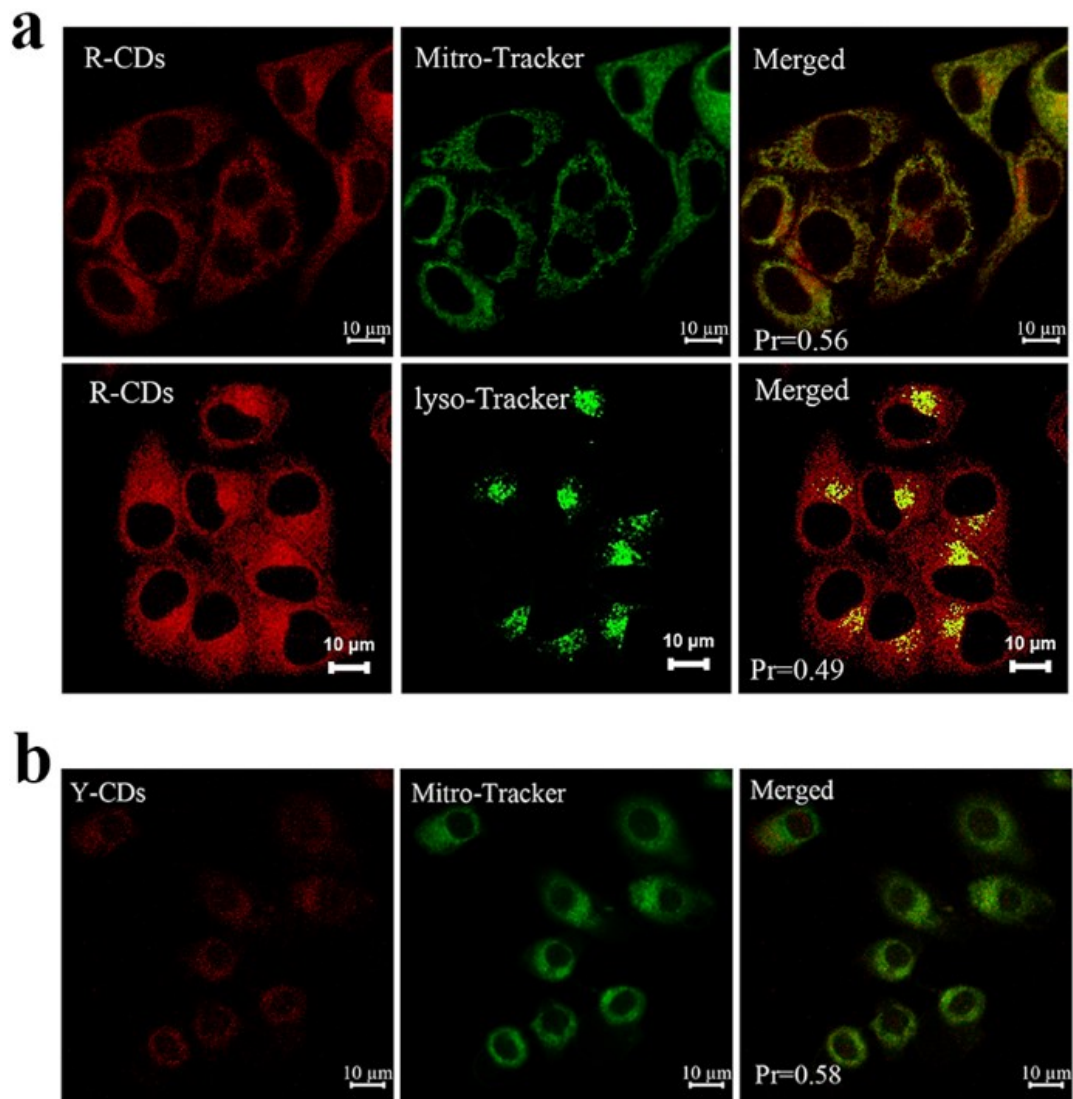

**Fig. S2** (a) Co-localization images of HepG2 cells incubated with R-CDs and co-stained with Mitro-Tracker and Lyso-Tracker respectively. (b) Co-localization images of HepG2 cells incubated with Y-CDs and co-stained with Mitro-Tracker.

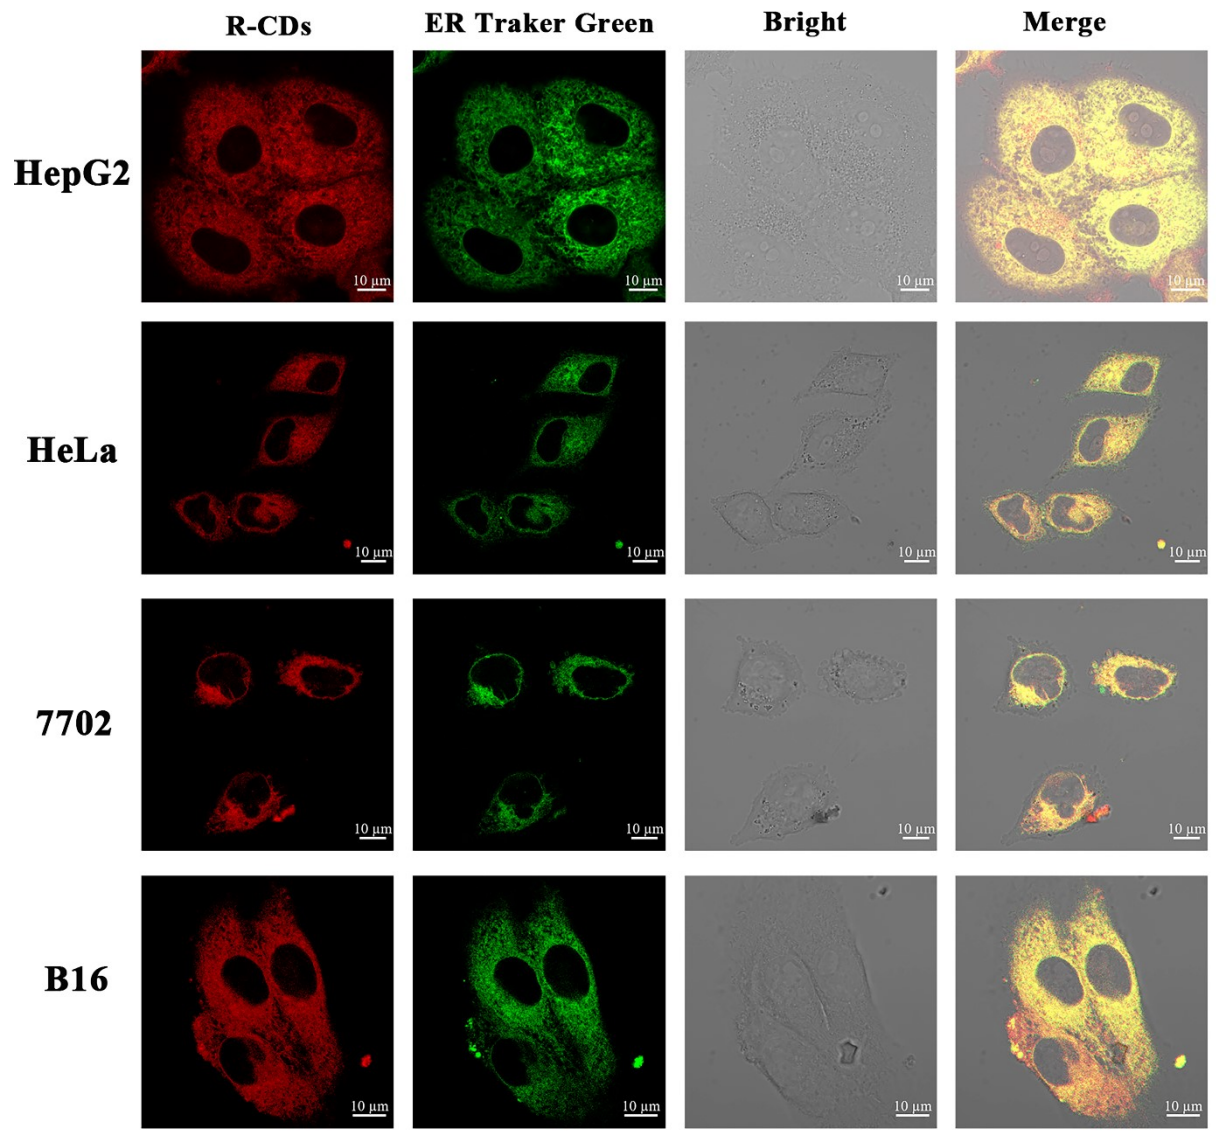

**Fig. S3** Co-localization images of various types of cells stained with **R-CDs** (20  $\mu\text{g}/\text{mL}$ ) for 20 min and co-stained with ER-Tracker Green (1  $\mu\text{M}$ ) for 30 min.



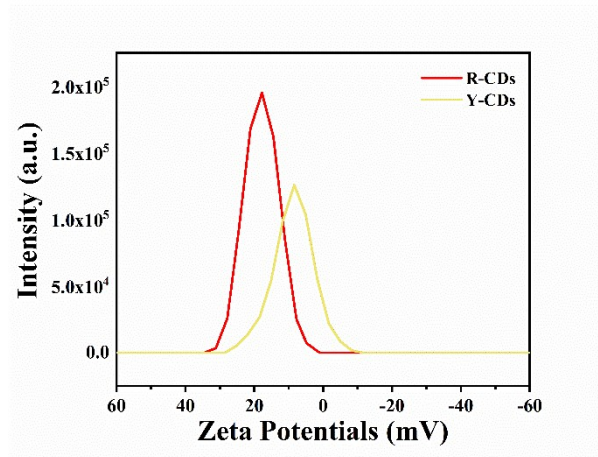

Fig. S4 Zeta potentials of Y-CDs and R-CDs.

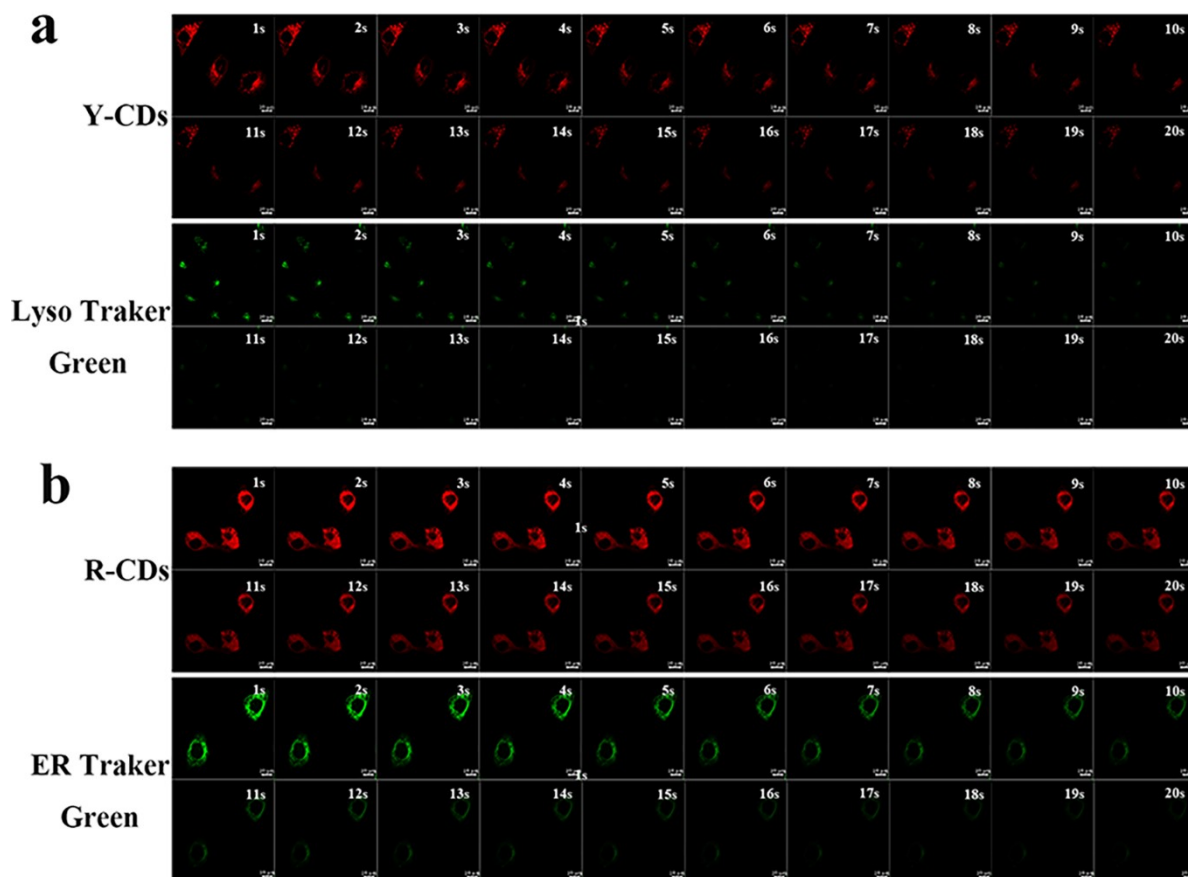

Fig. S5 Fluorescent images of HepG2 cells stained by Y-CDs / R-CDs (Red) and commercial dyes (green) with increasing time of scans.

**Table S1** The C, N and O contents of the **Y-CDs** and **R-CDs**.

|       | C      | N     | O      |
|-------|--------|-------|--------|
| Y-CDs | 84.19% | 1.72% | 14.09% |
| R-CDs | 90.45% | 2.34% | 7.12%  |

**Table S2** The relative area ratio of the covalent bond of C, N and O content of the **Y-CDs** and **R-CDs**.

|         | Y-CDs  | R-CDs  |
|---------|--------|--------|
| C-C/C=C | 82.07% | 77.95% |
| C-O/C-N | 17.93% | 12.47% |
| C=O     |        | 9.58%  |
| C=N     |        | 14.71% |
| N-H     | 93.44% | 75.99% |
| C-N     | 6.54%  | 9.29%  |
| C=O     | 75.72% | 83.365 |
| C-O     | 24.28% | 16.64% |
